# Supplementary material
Source: MDPI journal article supplement (https://www.mdpi.com/2218-0532/89/2/26)
Supplement: s1 [file s1]

## Supplementary Materials

### Exerting DNA Damaging Effects of the Ilimaquinones through the Active Hydroquinone Species

Apisada Jiso <sup>1</sup>, Laphatrada Yurasakpong <sup>2</sup>, Sirorat Janta <sup>2</sup>, Kulathida Chaithirayanon <sup>2</sup> and Anuchit Plubrukarn <sup>1,\*</sup>

<sup>1</sup> Department of Pharmacognosy and Pharmaceutical Botany, Faculty of Pharmaceutical Sciences, Prince of Songkla University, Hat-Yai, Songkhla 90112, Thailand; jiso.apisada@gmail.com (A.J.)

<sup>2</sup> Department of Anatomy, Faculty of Science, Mahidol University, Ratchathewi, Bangkok 10400, Thailand; barbaraormoll@gmail.com (L.Y.); ampsirirat@gmail.com (S.J.); kulathida.cha@mahidol.ac.th (K.C.)

\* Correspondence: anuchit.pl@psu.ac.th

## Content

|            |                                                                     |      |
|------------|---------------------------------------------------------------------|------|
| Figure S1  | $^1\text{H}$ NMR spectrum of <b>1</b> (500 MHz, DMSO- $d_6$ )       | S-3  |
| Figure S2  | $^{13}\text{C}$ NMR spectrum of <b>1</b> (125 MHz, DMSO- $d_6$ )    | S-4  |
| Figure S3  | $^1\text{H}$ NMR spectrum of <b>2</b> (500 MHz, DMSO- $d_6$ )       | S-5  |
| Figure S4  | $^{13}\text{C}$ NMR spectrum of <b>2</b> (125 MHz, DMSO- $d_6$ )    | S-6  |
| Figure S5  | $^1\text{H}$ NMR spectrum of <b>3</b> (500 MHz, benzene- $d_6$ )    | S-7  |
| Figure S6  | $^{13}\text{C}$ NMR spectrum of <b>3</b> (125 MHz, benzene- $d_6$ ) | S-8  |
| Figure S7  | $^1\text{H}$ NMR spectrum of <b>4</b> (500 MHz, DMSO- $d_6$ )       | S-9  |
| Figure S8  | $^{13}\text{C}$ NMR spectrum of <b>4</b> (125 MHz, DMSO- $d_6$ )    | S-10 |
| Figure S9  | $^1\text{H}$ NMR spectrum of <b>5</b> (500 MHz, DMSO- $d_6$ )       | S-11 |
| Figure S10 | $^{13}\text{C}$ NMR spectrum of <b>5</b> (125 MHz, DMSO- $d_6$ )    | S-12 |
| Figure S11 | $^1\text{H}$ NMR spectrum of <b>6</b> (500 MHz, benzene- $d_6$ )    | S-13 |
| Figure S12 | $^{13}\text{C}$ NMR spectrum of <b>6</b> (125 MHz, benzene- $d_6$ ) | S-14 |

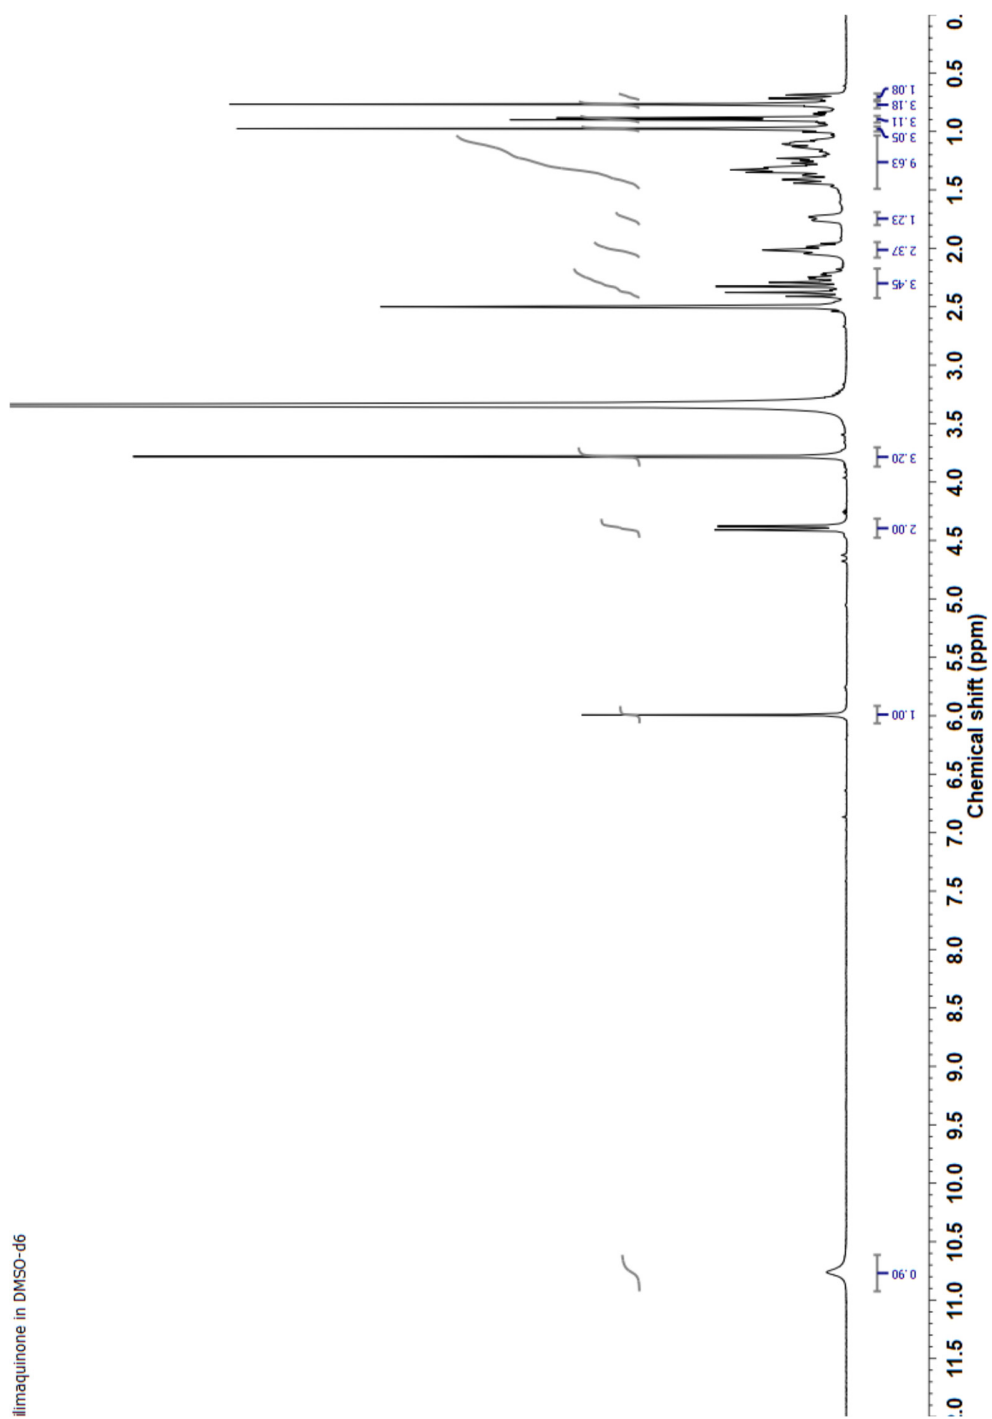

Figure S1 <sup>1</sup>H NMR spectrum of **1** (500 MHz, DMSO-d<sub>6</sub>)

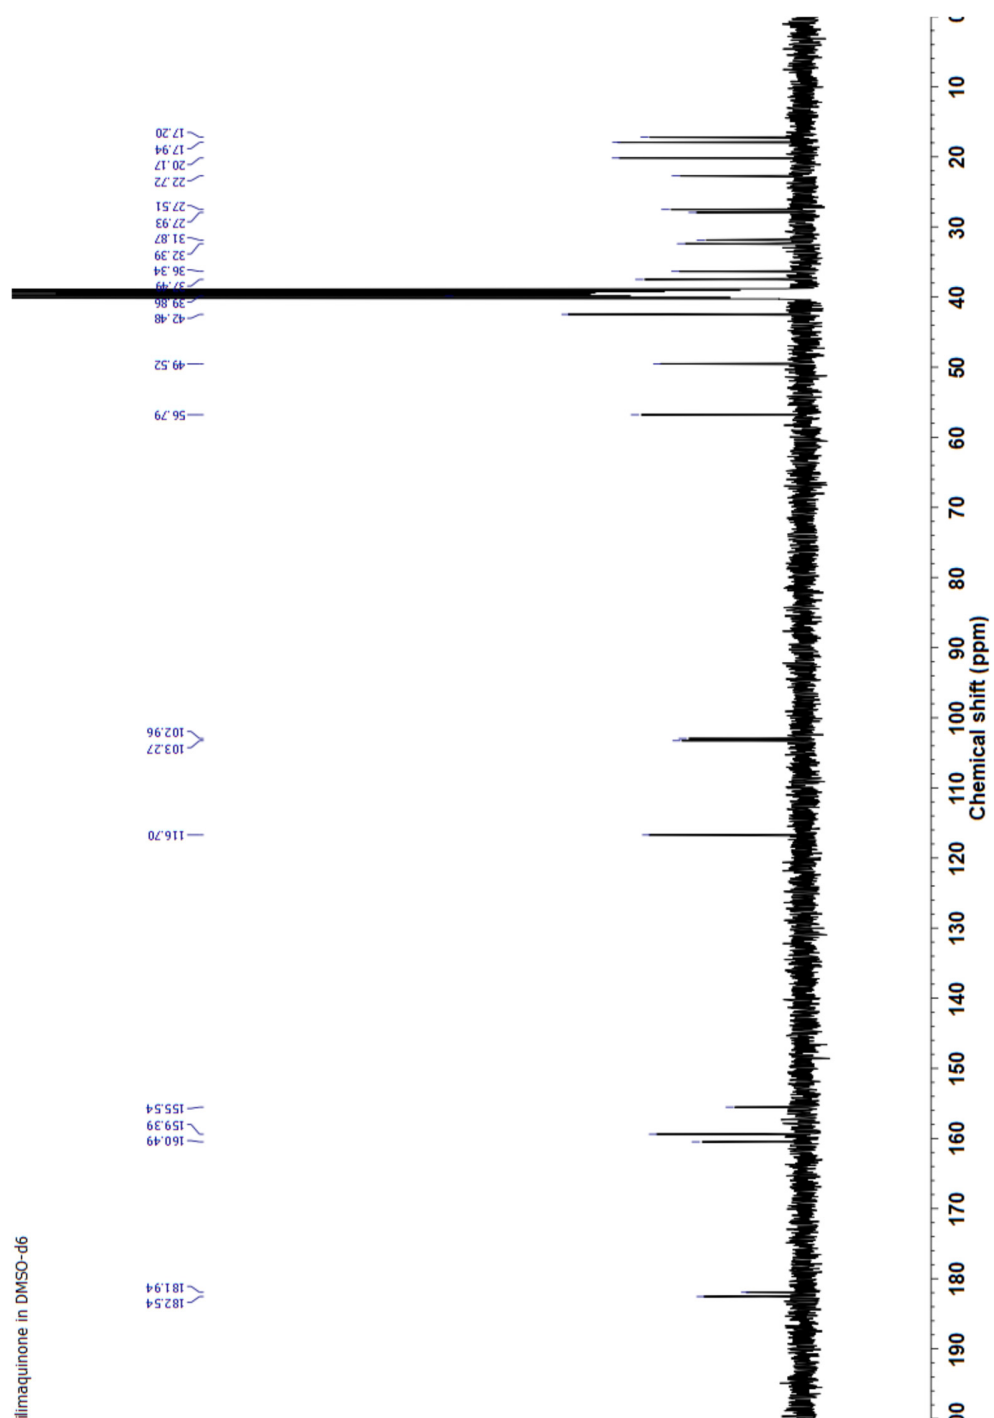

Figure S2  $^{13}\text{C}$  NMR spectrum of **1** (125 MHz, DMSO- $d_6$ )

ilimaquinol in DMSO-d6

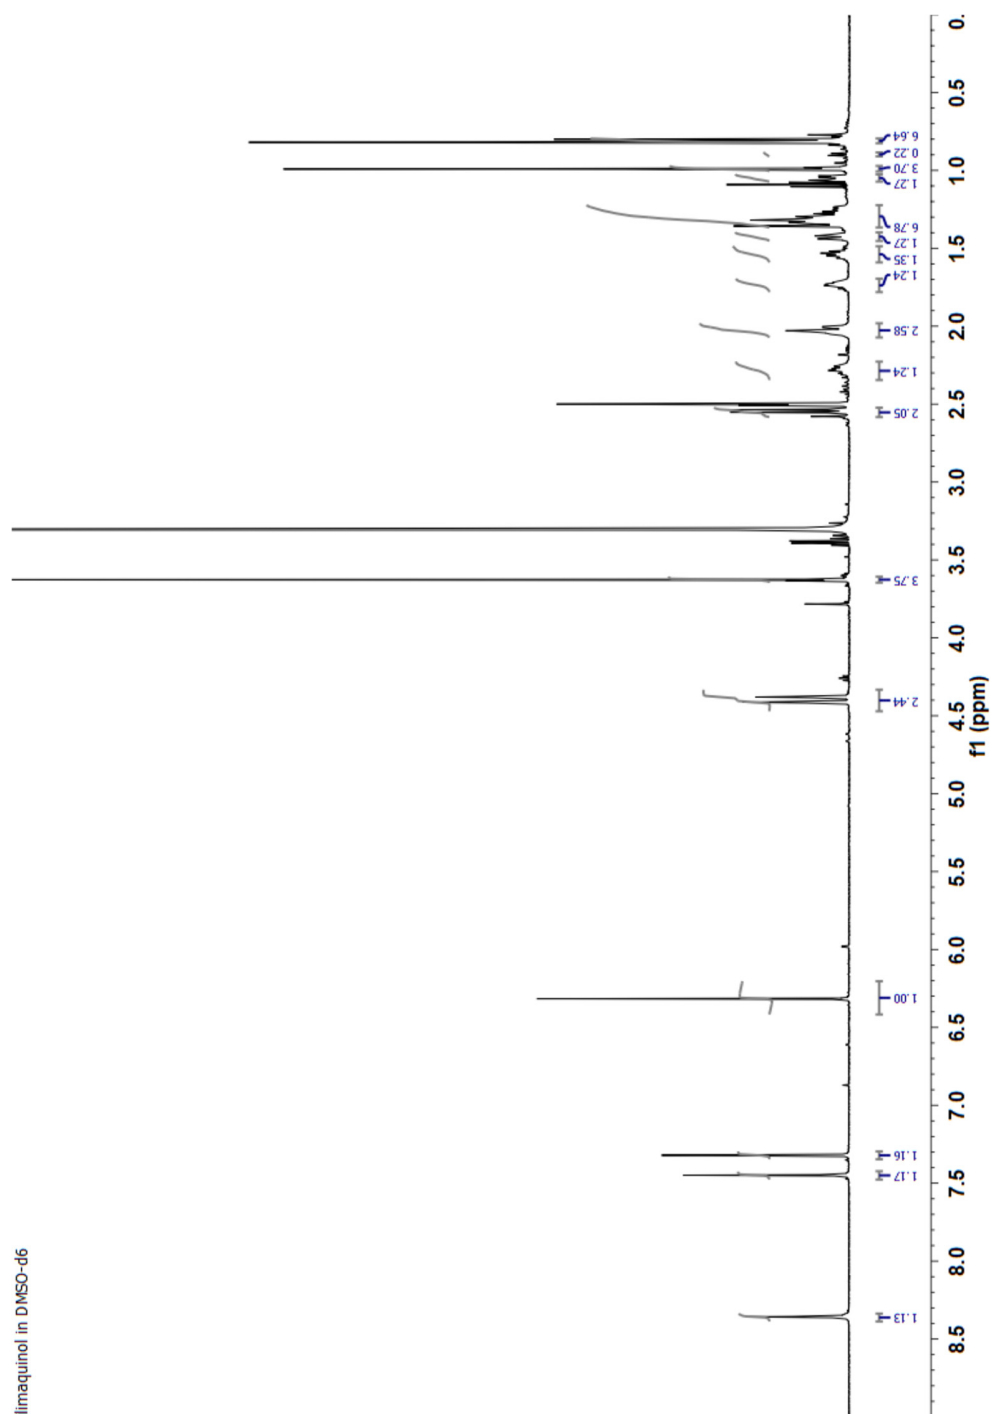

Figure S3 <sup>1</sup>H NMR spectrum of 2 (500 MHz, DMSO-d<sub>6</sub>)

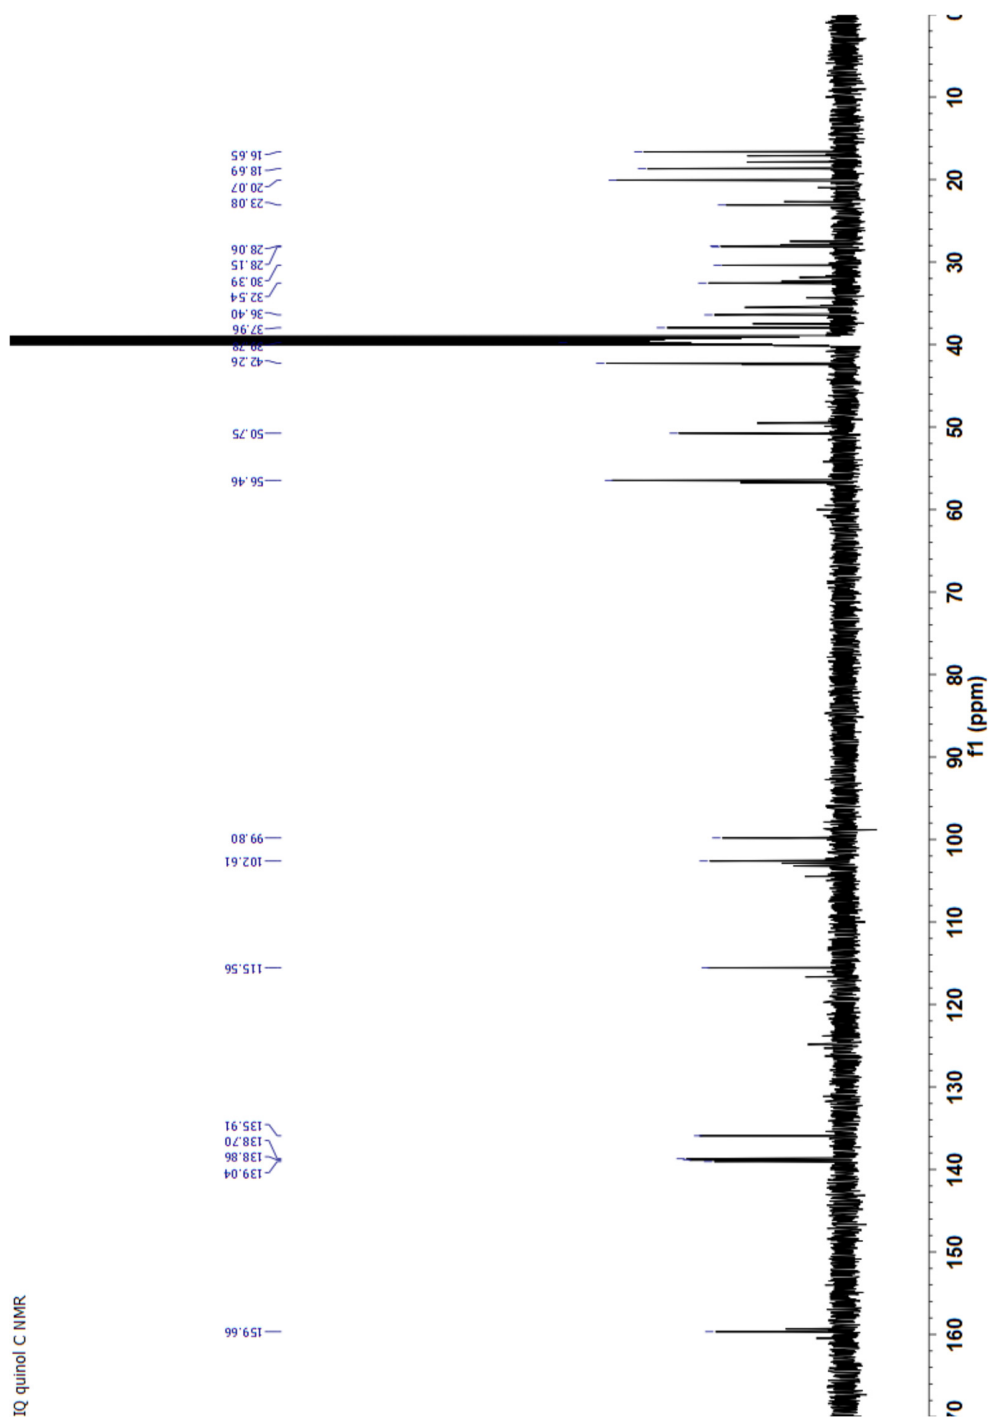

Figure S4  $^{13}\text{C}$  NMR spectrum of **2** (125 MHz,  $\text{DMSO-}d_6$ )

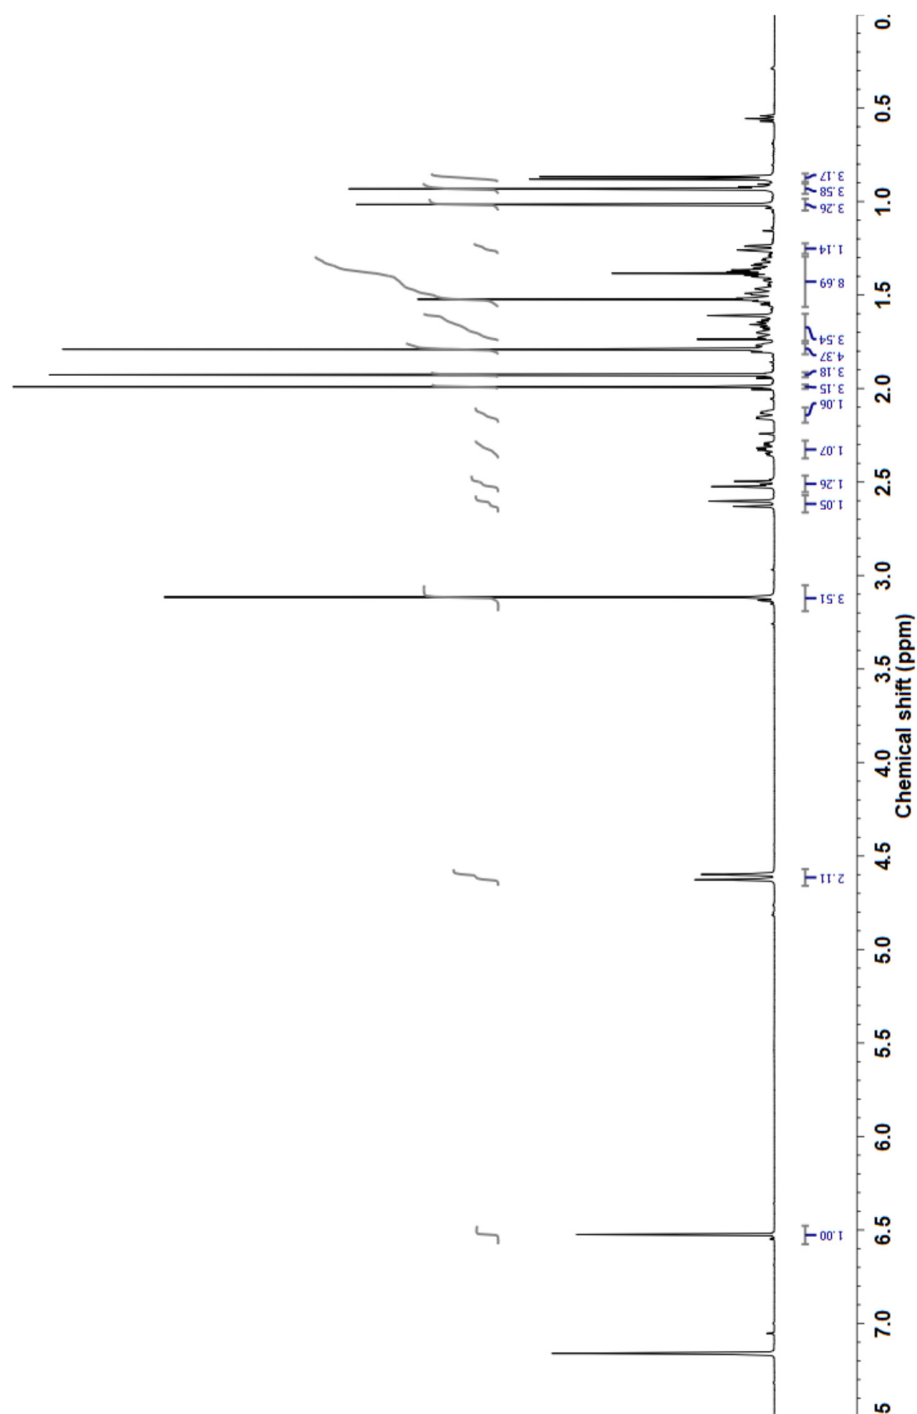

Figure S5  $^1\text{H}$  NMR spectrum of 3 (500 MHz,  $\text{benzene-}d_6$ )

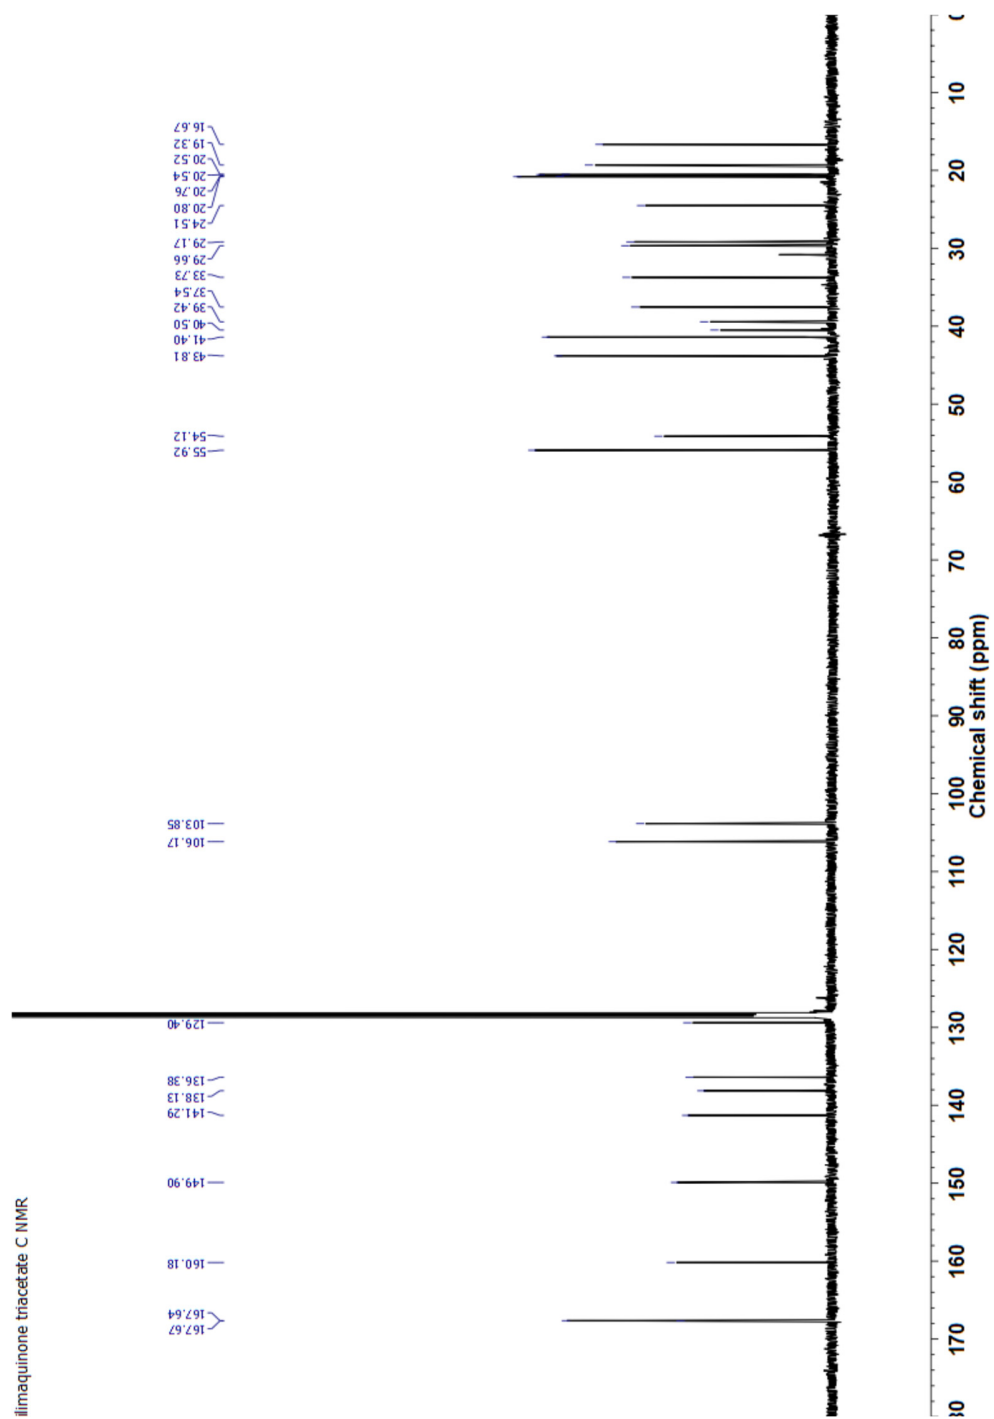

Figure S6  $^{13}\text{C}$  NMR spectrum of **3** (125 MHz, benzene- $d_6$ )





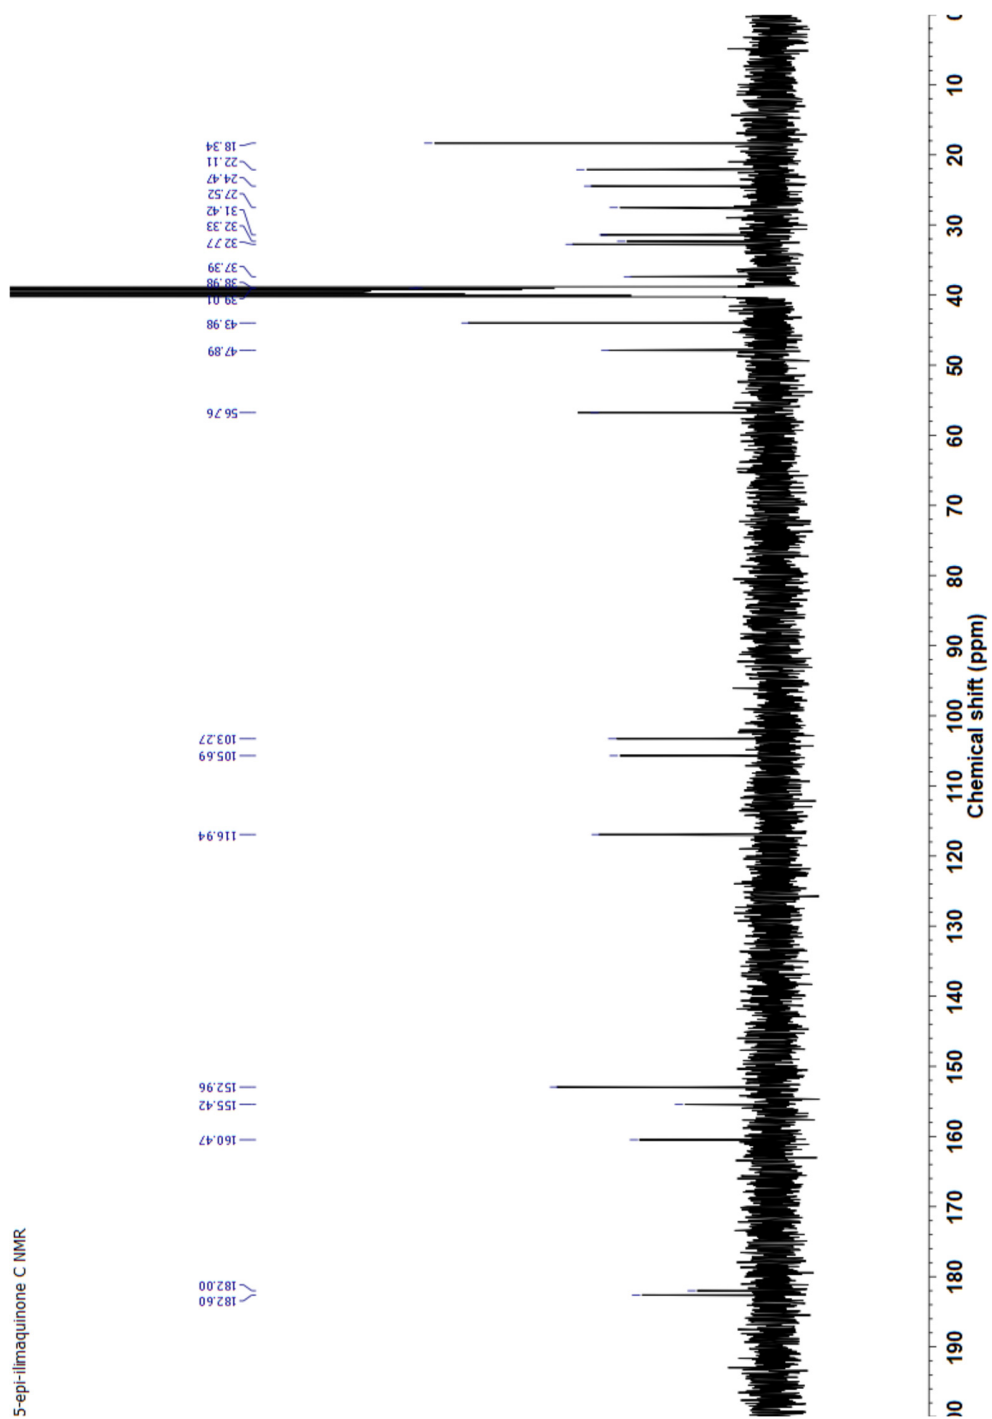

Figure S8  $^{13}\text{C}$  NMR spectrum of **4** (125 MHz,  $\text{DMSO-}d_6$ )

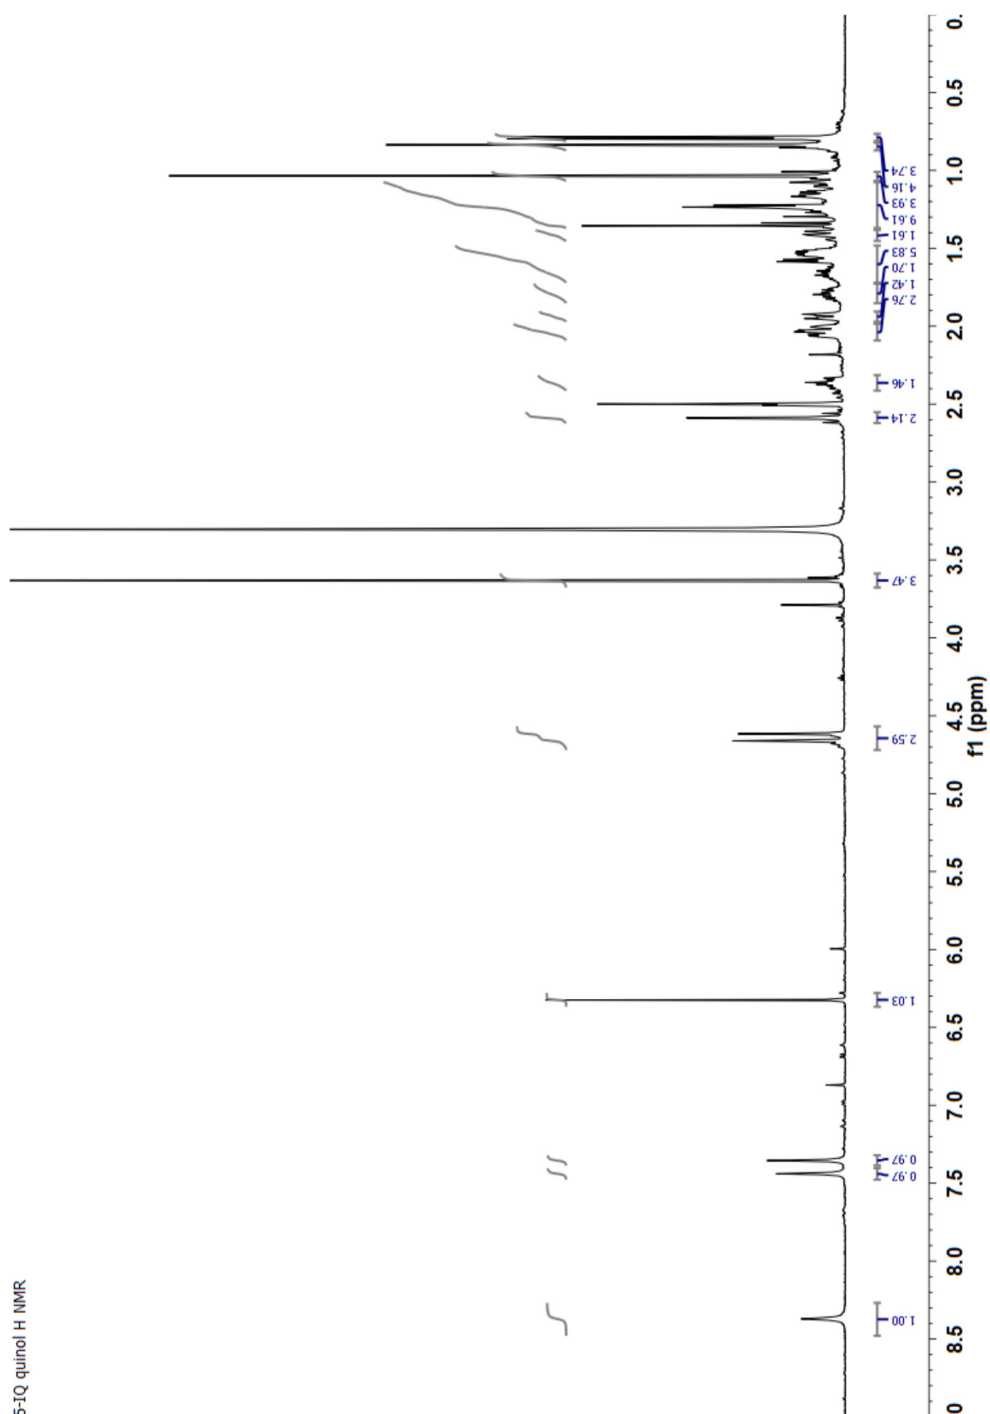

Figure S9  $^1\text{H}$  NMR spectrum of 5 (500 MHz,  $\text{DMSO-}d_6$ )

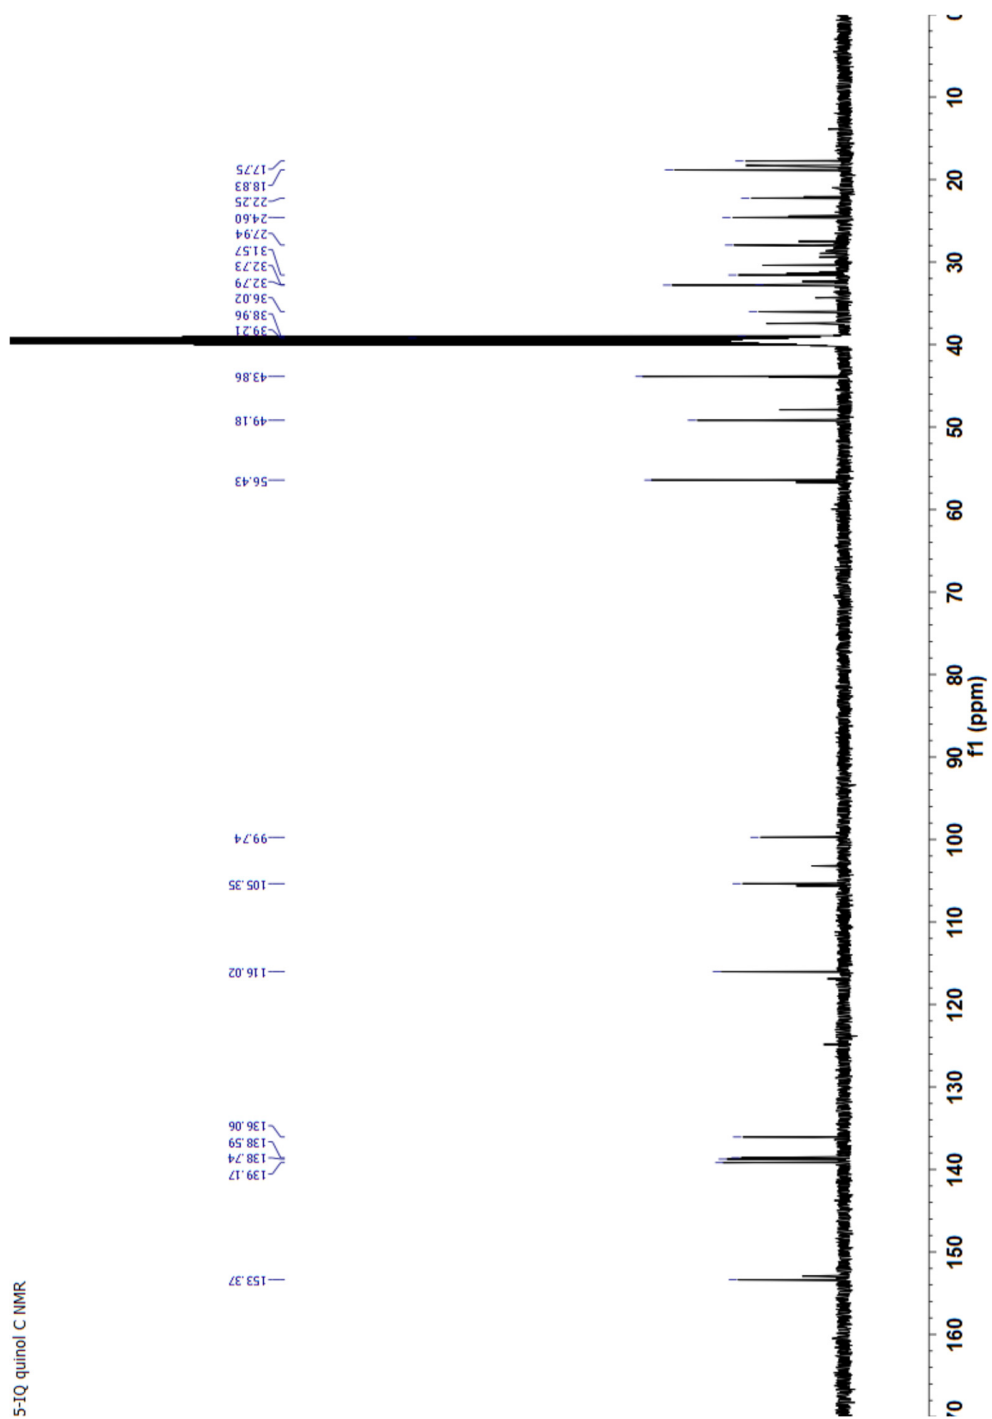

Figure S10  $^{13}\text{C}$  NMR spectrum of 5 (125 MHz,  $\text{DMSO-}d_6$ )

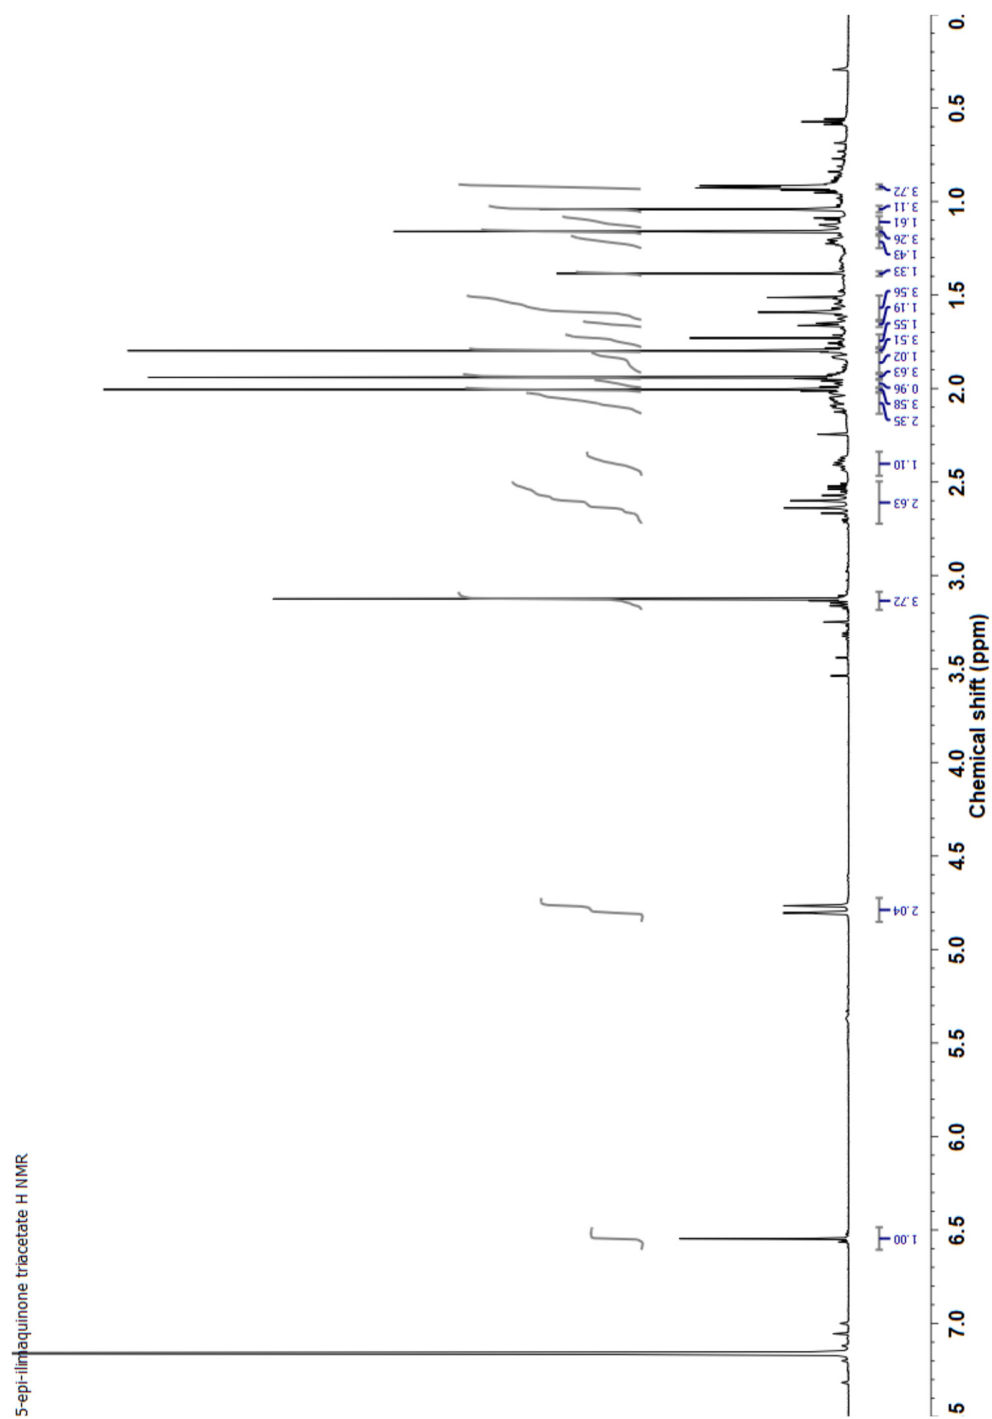

Figure S11 <sup>1</sup>H NMR spectrum of **6** (500 MHz, benzene-*d*<sub>6</sub>)

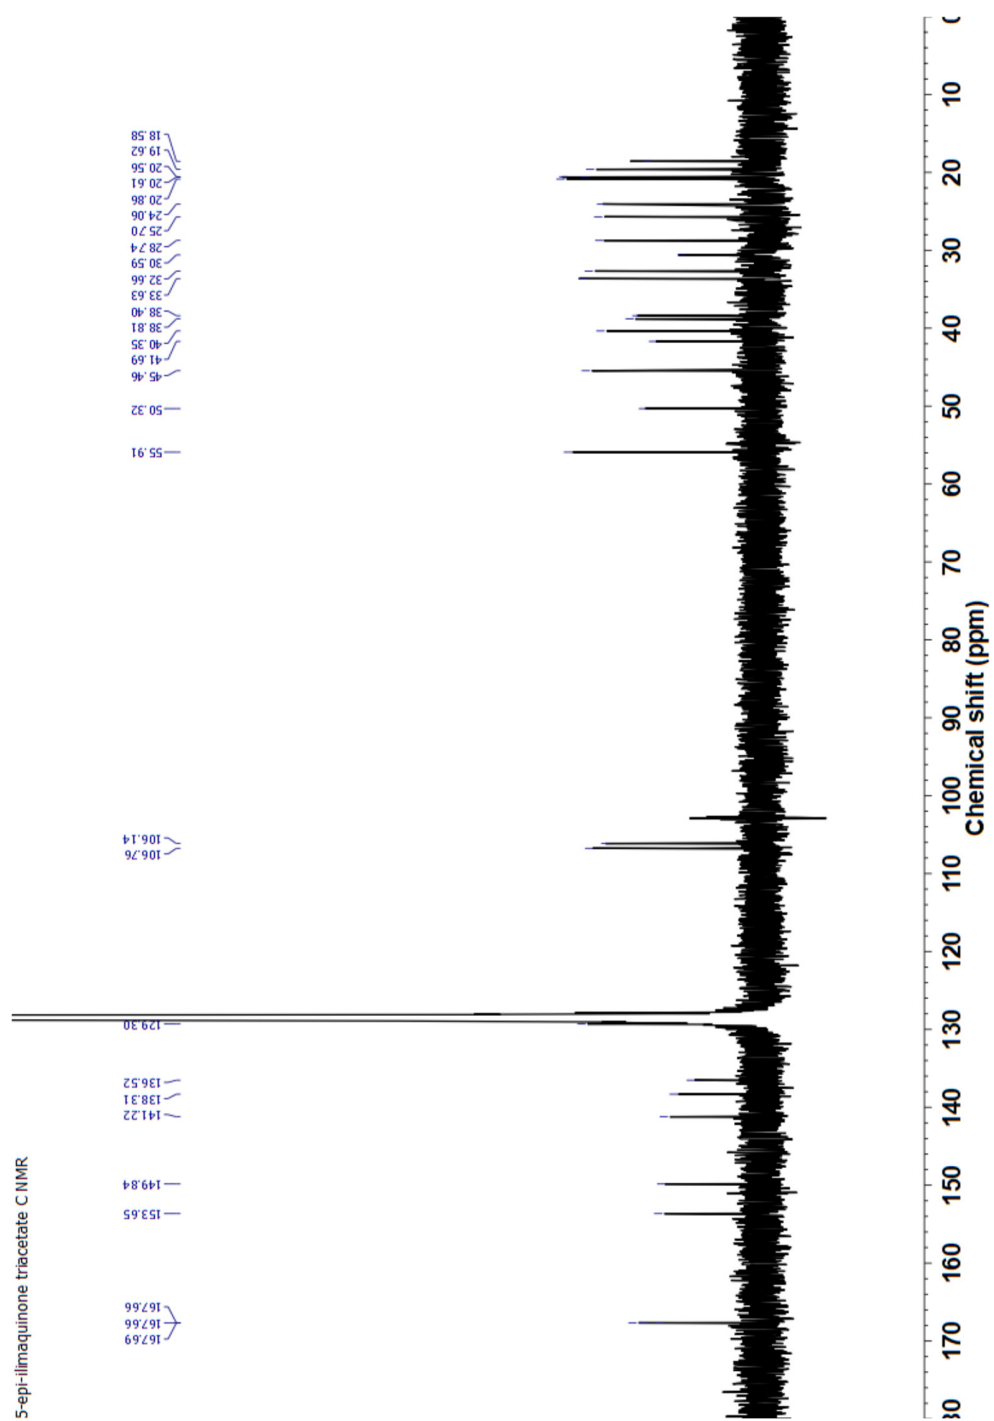

Figure S12  $^{13}\text{C}$  NMR spectrum of **6** (125 MHz, benzene- $d_6$ )
